# Supplementary material for: Effects of pressure on the structure and lattice dynamics of α-glycine: a combined experimental and theoretical study
Source: Royal Society of Chemistry journal article supplement (doi:10.1039/c8ce02123f), 2019-01-01
Supplement: c8ce02123f1.pdf [file c8ce02123f1.pdf]

**Electronic Supplementary Information for “Effects of pressure  
on the structure and lattice dynamics of  $\alpha$ -glycine: A combined  
experimental and theoretical study”**

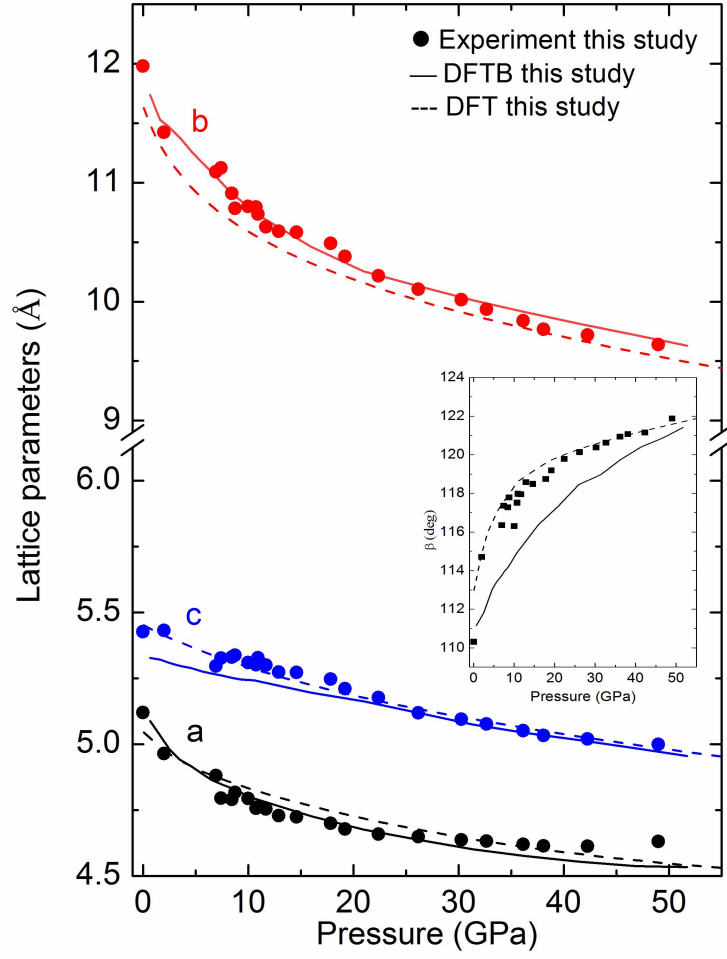

FIG. S1. Pressure-dependent lattice parameters and monoclinic  $\beta$  angle (inset) for  $\alpha$ -glycine. Experimental and calculated values are shown with symbols and either solid (DFTB) or dashed (DFT) curves, respectively.

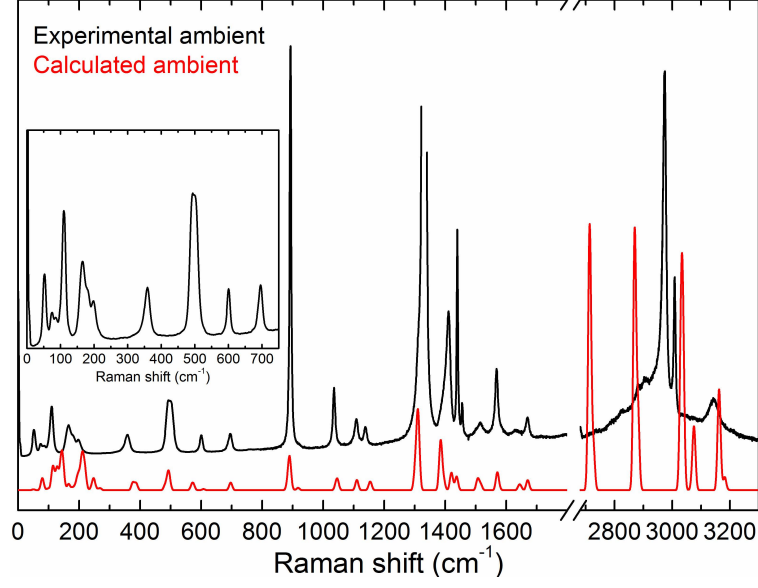

FIG. S2. Experimental and calculated Raman spectrum of  $\alpha$ -glycine at ambient conditions. The inset shows an expanded view of the low-frequency region of the experimental spectrum.

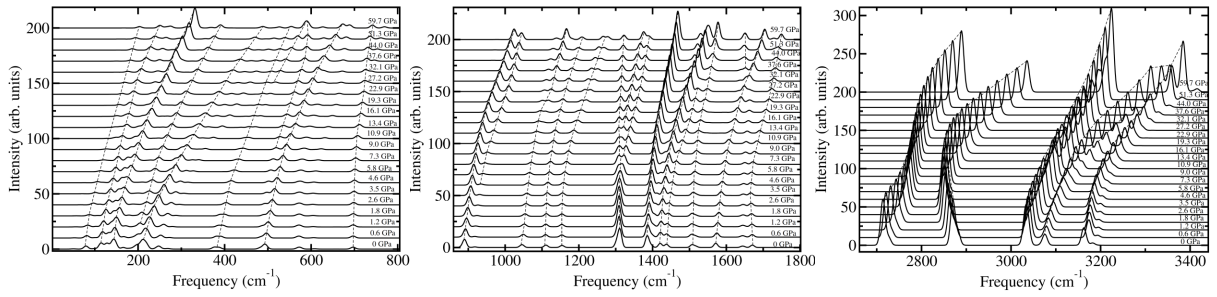

FIG. S3. Calculated Raman spectra of  $\alpha$ -glycine at selected pressures.
